# Supplementary material for: Behavioral Symptomatology in the Premenstruum
Source: MDPI journal article supplement (doi:10.3390/brainsci12070814), 2022-06-22

**Supplementary Table S1.** Domain type and symptoms of PMDD as specified in DSM-5 and DRSP.

| <b>DSM-5 Symptoms</b>                                                                                                      | <b>DRSP Question</b>                                                                                                                       | <b>Inclusion in Present Analysis</b> |
|----------------------------------------------------------------------------------------------------------------------------|--------------------------------------------------------------------------------------------------------------------------------------------|--------------------------------------|
| 1. Marked affective lability (e.g., mood swings, feeling suddenly sad or tearful, or increased sensitivity to rejection)*# | 5. Had mood swings (e.g., suddenly felt sad or tearful)<br>DRSP 6. Was more sensitive to rejection or my feelings were easily hurt         | Included as affective symptom        |
| 2. Marked irritability or anger or increased interpersonal conflicts**                                                     | 7. Felt angry, irritable<br>8. Had conflicts or problems with people                                                                       | Included as affective symptom        |
| 3. Marked depressed mood, feelings of hopelessness, or self-deprecating thoughts**                                         | 1. Felt depressed, sad, down, or blue<br>2. Felt hopeless<br>3. Felt worthless or guilty                                                   | Included as affective symptom        |
| 4. Marked anxiety, tension, and/or feelings of being keyed up or on edge*#                                                 | 4. Felt anxious, tense, keyed up, or on edge                                                                                               | Included as affective symptom        |
| 5. Decreased interest in usual activities (e.g., work, school, friends, hobbies)                                           | 9. Had less interest in usual activities (e.g., work, school, friends, hobbies)                                                            | Included as psychological symptom    |
| 6. Subjective difficulty in concentration                                                                                  | 10. Had difficulty concentrating                                                                                                           | Included as psychological symptom    |
| 7. A sense of being overwhelmed or out of control#                                                                         | 16. Felt overwhelmed or that I could not cope<br>17. Felt out of control                                                                   | Included as psychological symptom    |
| 8. Marked change in appetite; overeating; or specific food cravings                                                        | 12. Had increased appetite or overate<br>13. Had cravings for specific foods                                                               | Included as behavioral symptom       |
| 9. Hypersomnia or insomnia                                                                                                 | 14. Slept more, took naps, found it hard to get up when intended<br>15. Had trouble getting to sleep or staying asleep                     | Included as behavioral symptom       |
| 10. Lethargy, easy fatigability, or marked lack of energy                                                                  | 11. Felt lethargic, tired, fatigued, or had a lack of energy                                                                               | Not included – physical symptom      |
| 11. One physical symptom (for example, breast tenderness)                                                                  | 18. Had breast tenderness<br>19. Had breast swelling, felt bloated, or had weight gain<br>20. Had headache<br>21. Had joint or muscle pain | Not included – physical symptom      |
| * At least one symptom from items 1 to 4 in column 1 (DSM-5 Symptoms) be present for PMDD diagnosis                        |                                                                                                                                            |                                      |
| # The first symptom inside the parentheses was included in the analysis                                                    |                                                                                                                                            |                                      |

**Supplementary Table S2.** Means and standard deviations of individual symptom effect sizes.

| Premenstrual Symptom     | Mean   | Standard Deviation |
|--------------------------|--------|--------------------|
| DEPRESSION               | 0.0743 | 0.4758             |
| MOOD SWINGS              | 0.2145 | 0.5203             |
| ANGER                    | 0.2030 | 0.5415             |
| ANXIETY                  | 0.1448 | 0.5740             |
| DIFFICULTY CONCENTRATING | 0.1262 | 0.5456             |
| FELT OVERWHELMED         | 0.1646 | 0.5190             |
| LOW INTEREST             | 0.1096 | 0.5070             |
| INCREASED APPETITE       | 0.4188 | 0.5414             |
| FOOD CRAVINGS            | 0.4671 | 0.5540             |
| HYPERMOMNIA              | 0.1031 | 0.5074             |
| INSOMNIA                 | 0.1032 | 0.5770             |
| OCCUPATIONAL IMPAIRMENT  | 0.1552 | 0.5102             |
| RECREATIONAL IMPAIRMENT  | 0.1427 | 0.4723             |
| RELATIONAL IMPAIRMENT    | 0.1081 | 0.5127             |

**Supplementary Table S3.** Demographic characteristics according to diagnosis.

| Demographic Variable | Category                       | Diagnosis    |              |               | p value |
|----------------------|--------------------------------|--------------|--------------|---------------|---------|
|                      |                                | PMDD(n=8)    | PMS(n=25)    | Healthy(n=24) |         |
| Race                 | White                          | 3 (37.5)     | 7 (28.0)     | 9 (37.5)      | 0.8499  |
|                      | Black or African American      | 2 (25.0)     | 3 (12.0)     | 4 (16.7)      |         |
|                      | American Indian/Alaska Native  | 0 (0.0)      | 0 (0.0)      | 1 (4.2)       |         |
|                      | Asian                          | 2 (25.0)     | 12 (48.0)    | 7 (29.2)      |         |
|                      | More than one race             | 1 (12.5)     | 1 (4.0)      | 1 (4.2)       |         |
|                      | Unknown/do not want to specify | 0 (0.0)      | 2 (8.0)      | 2 (8.3)       |         |
| Age                  |                                | 24.50 (4.04) | 25.48 (5.02) | 27.00 (4.52)  | 0.338   |
| BMI                  |                                | 25.15 (4.35) | 24.92 (5.18) | 23.82 (3.60)  | 0.648   |
| Ethnicity            | Hispanic                       | 1 (12.5)     | 3 (12.0)     | 5 (20.8)      | 0.4187  |
|                      | Non-Hispanic                   | 6 (75.0)     | 22 (88.0)    | 18 (75.0)     |         |
|                      | Unknown/do not want to specify | 1 (12.5)     | 0 (0.0)      | 1 (4.2)       |         |
| Student Status       | Yes                            | 4 (50.0)     | 12 (48.0)    | 11 (45.8)     | 0.976   |
|                      | No                             | 4 (50.0)     | 13 (52.0)    | 13 (54.2)     |         |
| Marital Status       | Single                         | 8 (100.0)    | 22 (88.0)    | 22 (91.7)     | 0.8418  |
|                      | Married                        | 0 (0.0)      | 3 (12.0)     | 2 (8.3)       |         |
| Income               | Less than \$20,000             | 5 (62.5)     | 16 (64.0)    | 8 (33.3)      | 0.058   |
|                      | \$20,000-\$34,999              | 1 (12.5)     | 0 (0.0)      | 6 (25.0)      |         |
|                      | \$35,000-\$49,999              | 1 (12.5)     | 5 (20.0)     | 3 (12.5)      |         |
|                      | \$50,000-\$74,999              | 1 (12.5)     | 2 (8.0)      | 7 (29.2)      |         |
|                      | \$75,000 or more               | 0 (0.0)      | 2 (8.0)      | 0 (0.0)       |         |
| Age of Menarche      |                                | 12.40 (1.14) | 12.12 (0.93) | 11.83 (1.27)  | 0.594   |

**Supplementary Table S4.** Adjusted models evaluating premenstrual symptom relationships.

| SYMPTOM                   | ESTIMATE  | STANDARD ERROR | T VALUE | P VALUE |
|---------------------------|-----------|----------------|---------|---------|
| INSOMNIA                  |           |                |         |         |
| DEPRESSION                | -0.39557  | 0.294106       | -1.345  | 0.1912  |
| ANXIETY                   | 0.076034  | 0.196937       | 0.386   | 0.7028  |
| MOOD SWINGS               | 0.105953  | 0.282468       | 0.375   | 0.7109  |
| ANGER                     | 0.277414  | 0.243891       | 1.137   | 0.2666  |
| LOW INTEREST              | 0.599109  | 0.262505       | 2.282   | 0.0316* |
| DIFFICULTY CONCENTRATING  | -0.043421 | 0.25985        | -0.167  | 0.8687  |
| FELT OVERWHELMED          | 0.281331  | 0.236662       | 1.189   | 0.2462  |
| AGE                       | 0.019214  | 0.022362       | 0.859   | 0.3987  |
| AGE OF MENARCHE           | -0.005492 | 0.100084       | -0.055  | 0.9567  |
| HYPERSONMIA               |           |                |         |         |
| DEPRESSION                | 0.168902  | 0.266552       | 0.634   | 0.532   |
| ANXIETY                   | 0.123401  | 0.178487       | 0.691   | 0.496   |
| MOOD SWINGS               | -0.1103   | 0.256004       | -0.431  | 0.67    |
| ANGER                     | -0.136986 | 0.221042       | -0.62   | 0.541   |
| LOW INTEREST              | 0.236378  | 0.237912       | 0.994   | 0.33    |
| DIFFICULTY CONCENTRATING  | 0.327429  | 0.235506       | 1.39    | 0.177   |
| FELT OVERWHELMED          | 0.037541  | 0.21449        | 0.175   | 0.863   |
| AGE                       | 0.001869  | 0.020267       | 0.092   | 0.927   |
| AGE OF MENARCHE           | 0.042707  | 0.090708       | 0.471   | 0.642   |
| INCREASED APPETITE/EATING |           |                |         |         |
| DEPRESSION                | -0.58194  | 0.242341       | -2.401  | 0.0244* |
| ANXIETY                   | 0.163369  | 0.162275       | 1.007   | 0.3241  |
| MOOD SWINGS               | 0.252509  | 0.232752       | 1.085   | 0.2888  |
| ANGER                     | 0.080785  | 0.200965       | 0.402   | 0.6913  |
| LOW INTEREST              | 0.466179  | 0.216302       | 2.155   | 0.0414* |
| DIFFICULTY CONCENTRATING  | 0.296309  | 0.214115       | 1.384   | 0.1791  |
| FELT OVERWHELMED          | -0.065601 | 0.195008       | -0.336  | 0.7395  |
| AGE                       | -0.021103 | 0.018426       | -1.145  | 0.2634  |
| AGE OF MENARCHE           | 0.006783  | 0.082469       | 0.082   | 0.9351  |
| FOOD CRAVINGS             |           |                |         |         |
| DEPRESSION                | -0.575608 | 0.24692        | -2.331  | 0.0285* |
| ANXIETY                   | 0.088026  | 0.16534        | 0.532   | 0.5993  |
| MOOD SWINGS               | 0.423518  | 0.237149       | 1.786   | 0.0868  |
| ANGER                     | 0.191678  | 0.204761       | 0.936   | 0.3585  |
| LOW INTEREST              | -0.013931 | 0.220389       | -0.063  | 0.9501  |
| DIFFICULTY CONCENTRATING  | 0.488043  | 0.21816        | 2.237   | 0.0348* |
| FELT OVERWHELMED          | -0.036474 | 0.198692       | -0.184  | 0.8559  |
| AGE                       | -0.002857 | 0.018775       | -0.152  | 0.8803  |
| AGE OF MENARCHE           | -0.095875 | 0.084027       | -1.141  | 0.2651  |

**Supplementary Table S5.** Adjusted models evaluating relationship between behavioral symptoms and functionality.

| SYMPTOM                 | ESTIMATE | STANDARD ERROR | T VALUE | P VALUE  |
|-------------------------|----------|----------------|---------|----------|
| OCCUPATIONAL IMPAIRMENT |          |                |         |          |
| INSOMNIA                | 0.3122   | 0.14097        | 2.215   | 0.0354 * |
| HYPERSOMNIA             | 0.10048  | 0.16644        | 0.604   | 0.5511   |
| FOOD CRAVINGS           | 0.25927  | 0.18767        | 1.381   | 0.1785   |
| INCREASED APPETITE      | 0.06005  | 0.19803        | 0.303   | 0.7641   |
| AGE                     | 0.01244  | 0.01583        | 0.786   | 0.4388   |
| AGE OF MENARCHE         | -0.0166  | 0.07087        | -0.234  | 0.8166   |
| RECREATIONAL IMPAIRMENT |          |                |         |          |
| INSOMNIA                | 0.26824  | 0.11119        | 2.412   | 0.0229 * |
| HYPERSOMNIA             | 0.286    | 0.13128        | 2.178   | 0.0383 * |
| FOOD CRAVINGS           | 0.35444  | 0.14803        | 2.394   | 0.0239 * |
| INCREASED APPETITE      | -0.12805 | 0.1562         | -0.82   | 0.4195   |
| AGE                     | -0.0141  | 0.01249        | -1.129  | 0.2689   |
| AGE OF MENARCHE         | -0.05205 | 0.0559         | -0.931  | 0.3601   |
| RELATIONAL IMPAIRMENT   |          |                |         |          |
| INSOMNIA                | 0.281846 | 0.161617       | 1.744   | 0.0926 . |
| HYPERSOMNIA             | 0.009164 | 0.190822       | 0.048   | 0.962    |
| FOOD CRAVINGS           | 0.076698 | 0.215162       | 0.356   | 0.7243   |
| INCREASED APPETITE      | 0.189924 | 0.22704        | 0.837   | 0.4102   |
| AGE                     | 0.018914 | 0.018151       | 1.042   | 0.3066   |
| AGE OF MENARCHE         | 0.006445 | 0.081253       | 0.079   | 0.9374   |

**Supplementary Figure S1.** QQ plots of the four models evaluating relationships between behavioral and affective/physiological premenstrual symptoms.

**1A. INSOMNIA**

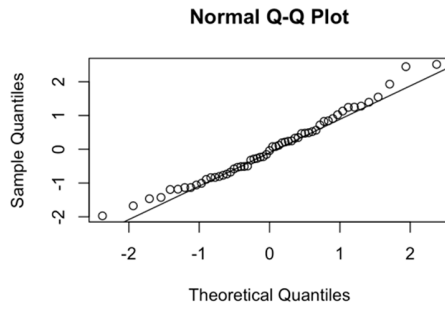

**1B. HYPERSOMNIA**

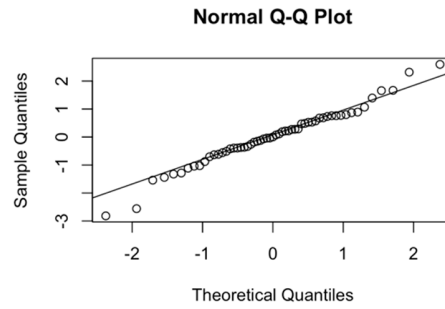

**1C. INCREASED APPETITE/EATING**

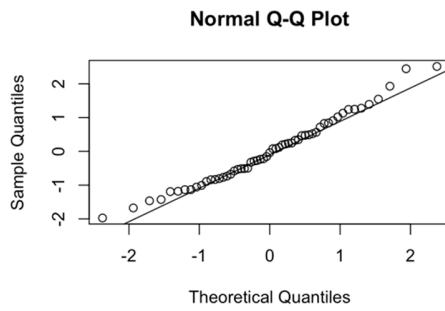

**1D. FOOD CRAVINGS**

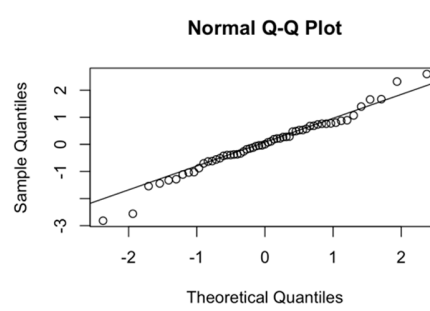

**Supplementary Figure S2.** QQ plots of the four models evaluating relationships between functionality and behavioral symptoms.

2A. OCCUPATIONAL IMPAIRMENT

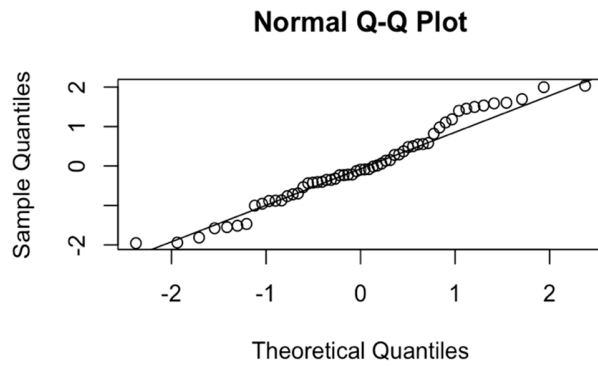

2B. RECREATIONAL IMPAIRMENT

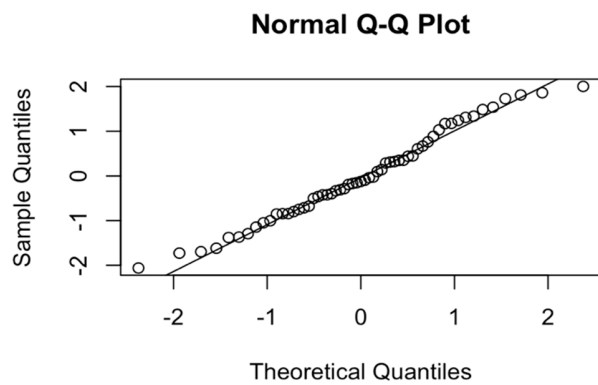

2C. RELATIONAL IMPAIRMENT

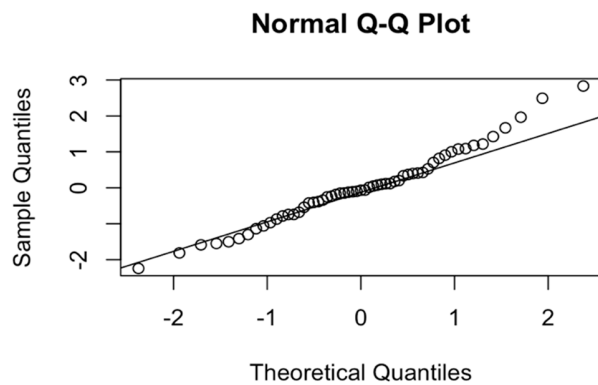

Supplement: s1 [file s1]
